# Supplementary material for: CO2/CH4 Separation in Amino Acid Ionic Liquids, Polymerized Ionic Liquids, and Mixed Matrix Membranes
Source: MDPI journal article supplement (doi:10.3390/molecules29061357), 2024-03-19
Supplement: s1 [file s1]

# Amino Acid Ionic Liquids-Polymerized Ionic Liquids - Mixed Matrix Membranes for CO<sub>2</sub>/CH<sub>4</sub> Separation

Gowri Selvaraj<sup>1</sup> and Cecilia Devi Wilfred<sup>1,2,\*</sup>

- <sup>1</sup> Centre of Research in Ionic Liquids (CORIL), Institute of Contaminant Management (ICM), Universiti Teknologi PETRONAS, 32610 Sri Iskandar, Perak, Malaysia; selgowri@gmail.com
- <sup>2</sup> Fundamental and Applied Sciences, Universiti Teknologi PETRONAS, Seri Iskandar, 32610 Perak, Malaysia
- \* Correspondence: cecili@utp.edu.my

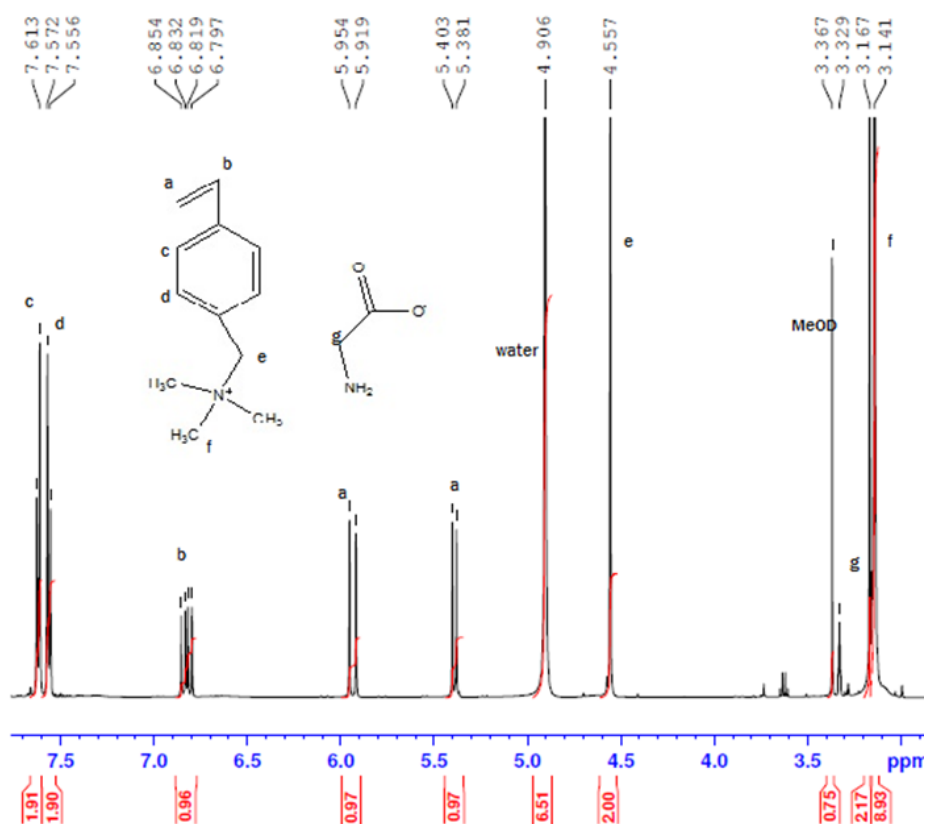

Figure S1: <sup>1</sup>H spectrum of [VBTMA][Gly].

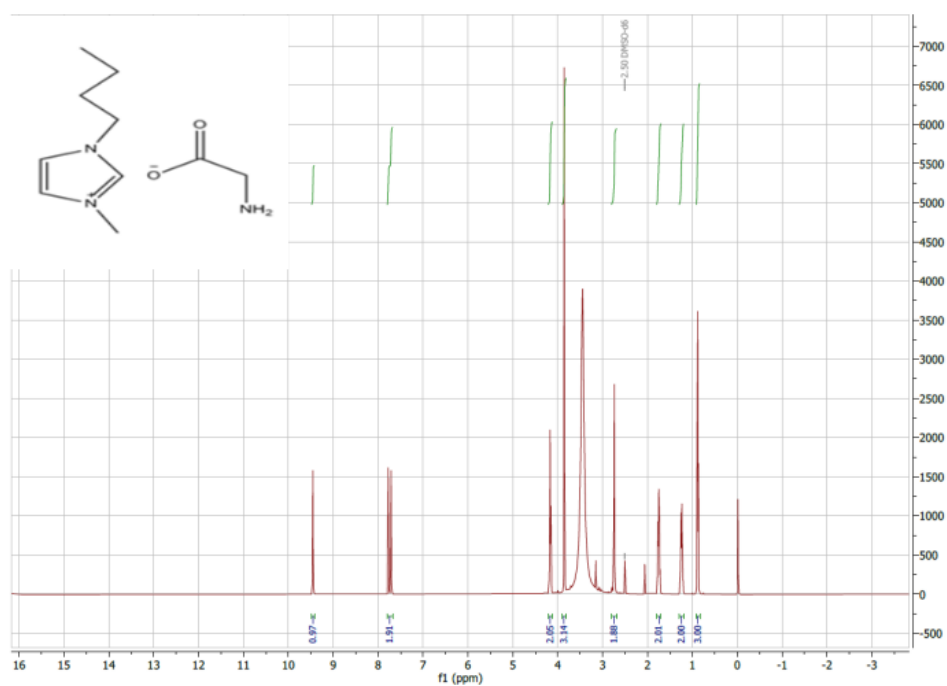

Figure S2:  $^1\text{H}$  spectrum of [BMIM][Gly].
